# Supplementary material for: Volatile Organic Compounds in Anatomical Pathology Wards: Comparative and Qualitative Assessment of Indoor Airborne Pollution
Source: MDPI journal article supplement (doi:10.3390/ijerph14060609), 2017-06-07
Supplement: s1 [file s1]

**Table S1.** Chromatographic areas (measured as TIC/min, total ion current per minute) of ethanol, 2-butanone and thiophene measured in ward A and ward B; reciprocal relationships between ethanol and other compounds measured by regression analysis ( $R^2$ ).

|                        | <b>ethanol</b>      | <b>2-butanone</b> | <b>thiophene</b> |
|------------------------|---------------------|-------------------|------------------|
| Slide storage room "A" | 19309628            | 4160136           | 2216             |
| Processing room "A"    | 905910016           | 196863376         | 3007932          |
| Hystology room "A"     | 933407488           | 326647264         | 12206169         |
| Secretariat room "A"   | 25591334            | 7440968           | 172652           |
| Slide storage room "B" | 4643855             | 662437            | 30899            |
| Processing room "B"    | 154108664           | 55432104          | 1597099          |
| Hystology room "B"     | 8016267             | 1911267           | 52572            |
| Secretariat room "B"   | 976529              | 381601            | 3427             |
|                        | ethanol: 2-butanone | $R^2 = 0.9277$    | $p < 0.01$       |
|                        | ethanol: thiophene  | $R^2 = 0.6751$    | $p = 0.012$      |
